# Supplementary material
Source: ML conference proceedings conference paper supplement (https://openreview.net/forum?id=0ZnEzvSLNR)

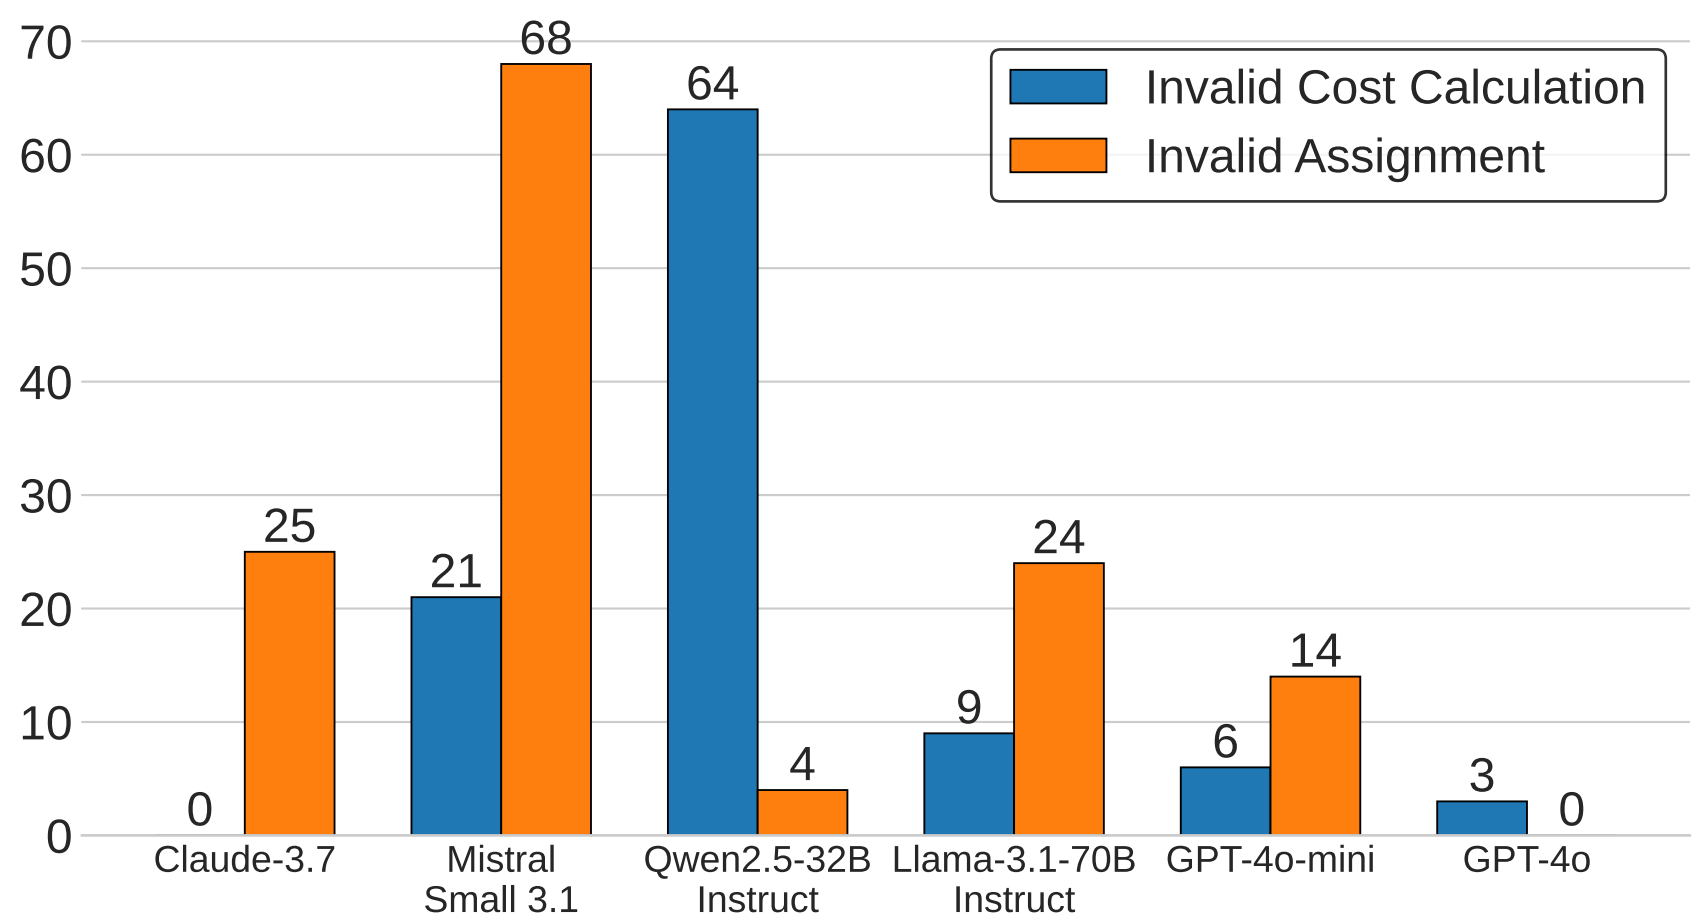

Supplement: supplementary_material [file error_analysis.pdf › submission/experiment0/error_analysis.pdf]
